# Supplementary material for: Zeolite-catalyzed isomerization of tetroses in aqueous medium
Source: Royal Society of Chemistry journal article supplement (doi:10.1039/c4cy00205a), 2014-05-28
Supplement: c4cy00205a1.pdf [file c4cy00205a1.pdf]

## SUPPORTING INFORMATION

### Zeolite-Catalysed Isomerisation of Erythrose in Aqueous Medium

Shunmugavel Saravanamurugan and Anders Riisager

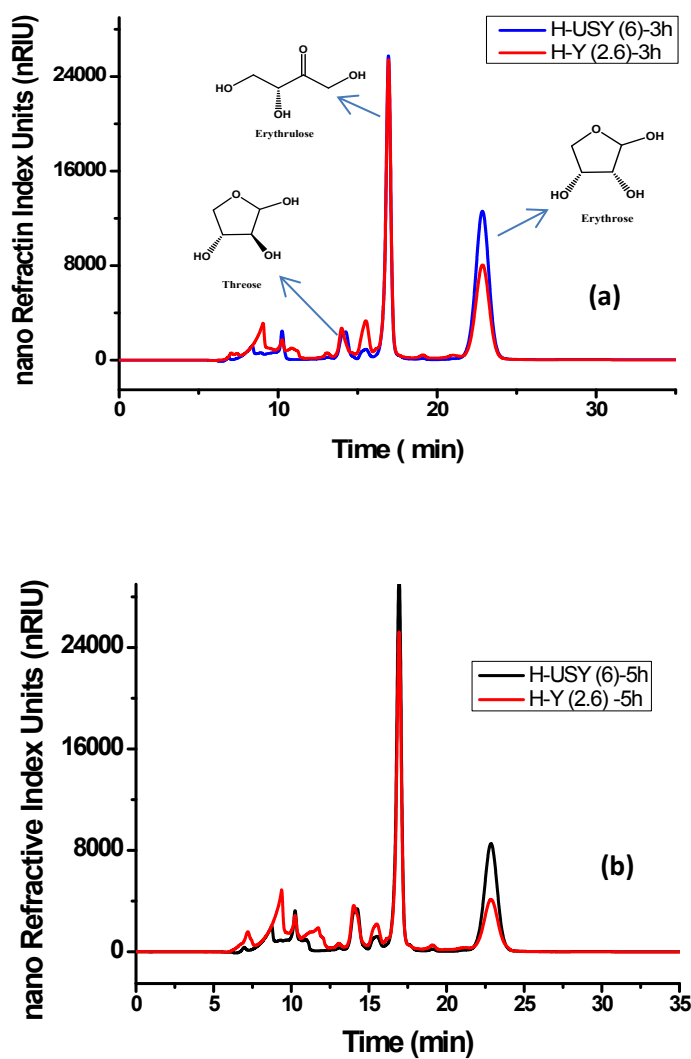

Figure S1. HPLC chromatogram of ERO reacted in water with H-Y(2.6) and H-USY(6) after a) 3 h and b) 5 h.

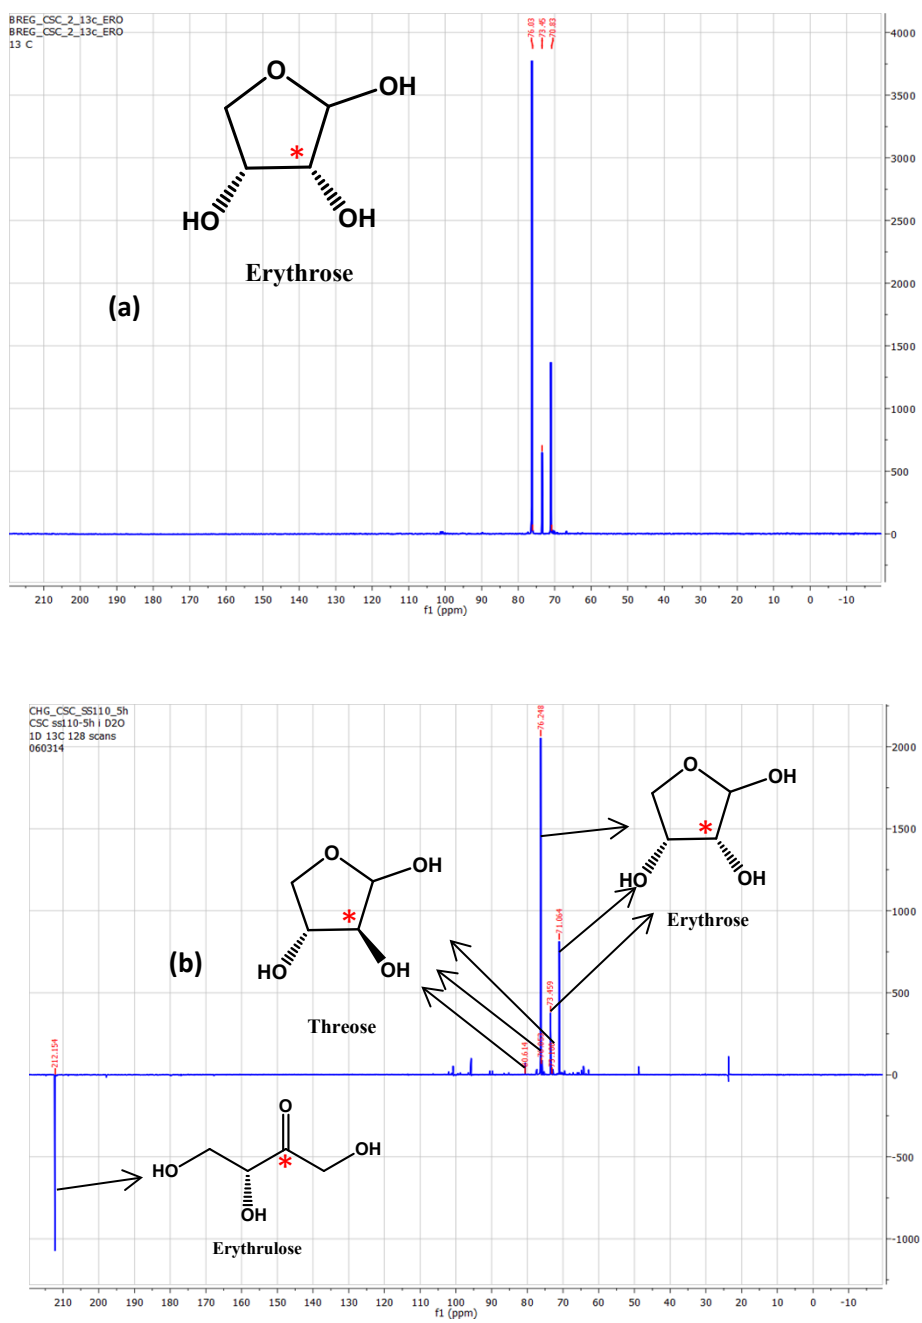

Figure S2.  $^{13}\text{C}$ -NMR spectra of ERO a) before and b) after reaction with H-USY(6) in  $\text{D}_2\text{O}$ .

### NH<sub>3</sub>- TPD measurement

The number of acid sites present in the zeolites was measured using an AutoChem II 2920. 100 mg of the sample was placed in a quartz reactor and degassed at 500 °C for 1 h in a flow of helium at the rate of 50 ml/min. The reactor was then cooled to 100 °C and ammonia (50 ml/min) was allowed to get adsorbed at the same temperature for 2 h. Before the ammonia desorption measurement, the sample was flushed with helium at the rate of 50 ml/min to remove the physisorbed ammonia. Ammonia desorption was measured each second from 100 to 500 °C at a ramp of 10 °C/min.

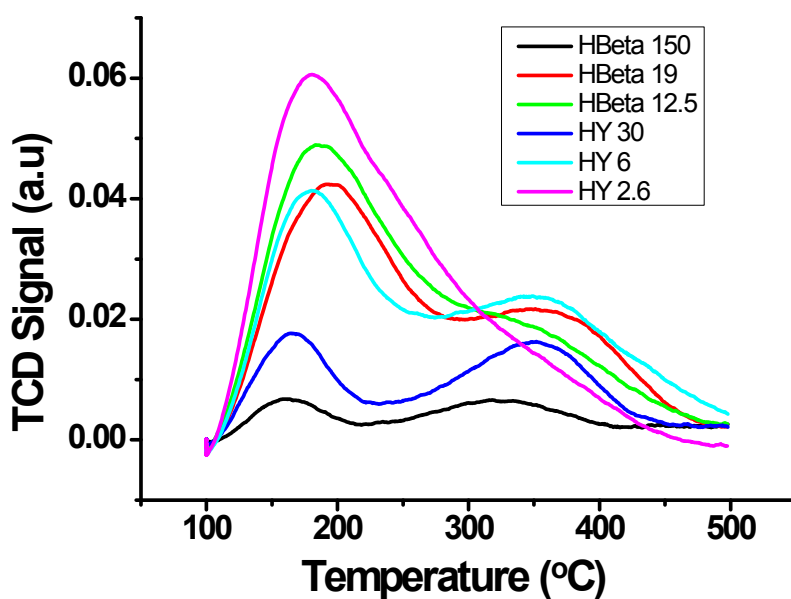

Figure S3. NH<sub>3</sub>-TPD profile of Y, Beta and ZSM-5 zeolites

Table S1. Product distribution and total yield of tetroses

| Time<br>(h) | ERO as substrate            |      |      |                          | ERU as substrate            |      |     |                          | THO as substrate            |      |      |                          |
|-------------|-----------------------------|------|------|--------------------------|-----------------------------|------|-----|--------------------------|-----------------------------|------|------|--------------------------|
|             | Product distribution<br>(%) |      |      | Total<br>tetroses<br>(%) | Product distribution<br>(%) |      |     | Total<br>tetroses<br>(%) | Product distribution<br>(%) |      |      | Total<br>tetroses<br>(%) |
|             | ERO                         | ERU  | THO  |                          | ERO                         | ERU  | THO |                          | ERO                         | ERU  | THO  |                          |
| 0.5         | 89.4                        | 5.9  | <0.1 | 95.4                     | 1.8                         | 92.1 | 1.4 | 95,3                     | 0.3                         | 5    | 91.1 | 96.4                     |
| 1           | 82.1                        | 11.6 | 0.3  | 94.3                     | 3                           | 86.4 | 2.8 | 92.2                     | 0.5                         | 9.8  | 84.1 | 94.4                     |
| 2           | 66.7                        | 21.9 | 0.5  | 89.1                     | 4.9                         | 74.9 | 5.2 | 85                       | 1.1                         | 18.0 | 69.3 | 88.4                     |
| 4           | 45.4                        | 33.4 | 1.6  | 80.4                     | 6.2                         | 57.3 | 6.9 | 70,4                     | 2.4                         | 26.0 | 49.4 | 77.8                     |
| 6           | 32.7                        | 37.4 | 2.6  | 72.7                     | 5.3                         | 45.6 | 7.6 | 58.5                     | 3.4                         | 31.6 | 36.3 | 71.3                     |
| 19          | 3.1                         | 21.5 | 4.6  | 29.2                     | 1.9                         | 15.6 | 4.4 | 21.9                     | 2.1                         | 31.6 | 6.3  | 40                       |
| 24          | 1.3                         | 12.1 | 2.6  | 16                       | 1.2                         | 9.6  | 3   | 13.8                     | 2.1                         | 15.8 | 5.1  | 23                       |
| 30          | 0.9                         | 7.8  | 1.6  | 10.3                     | 1.3                         | 9.9  | 3   | 14.2                     | 1.3                         | 10.5 | 2.8  | 14.6                     |
| 36          | 0.5                         | 4.2  | 1.3  | 6                        | 0.8                         | 6    | 1.9 | 8.7                      | 0.7                         | 5.5  | 1.7  | 7.9                      |
